# Supplementary material for: The Genetic Basis of Gene Expression Divergence in Antennae of Two Closely Related Moth Species, Helicoverpa armigera and Helicoverpa assulta
Source: MDPI journal article supplement (doi:10.3390/ijms231710050), 2022-09-02
Supplement: s1 [file s1]

## Supplementary Tables and Figures

**Table S1.** Mapping of RNA-seq reads from male F<sub>1</sub> hybrids to *H. armigera*.

|                                                      | Total or average |
|------------------------------------------------------|------------------|
| Total number of reads mapping on the reference       | 349900334        |
| Number of reads unambiguously assigned to a parent   | 188125299        |
| Proportion of reads unambiguously assigned to parent | 53.77%           |
| Number of reads unambiguously assigned to RR         | 91596438         |
| Number of reads unambiguously assigned to SS         | 96528861         |
| Number of reads with uninformative assignment        | 51191609         |
| Number of reads with unknown or ambiguous assignment | 110583426        |
| Total number of SNPs identified                      | 4217188          |
| Total number of child unique SNPs                    | 2253773          |

Note: This table presents the number of reads generated vs those that could be unambiguously mapped to one parental genome or the other based on species-informative single nucleotide variants using Stampy (see Materials and methods). The right-most column reports the total of RS\_M, RSabn\_M and SR\_M. RR = *H. armigera*, SS = *H. assulta*.

**Table S2.** Mapping of RNA-seq reads from female F<sub>1</sub> hybrids to *H. armigera*.

|                                                      | Total or average |
|------------------------------------------------------|------------------|
| Total number of reads mapping on the reference       | 184292437        |
| Number of reads unambiguously assigned to a parent   | 99587705         |
| Proportion of reads unambiguously assigned to parent | 54.04%           |
| Number of reads unambiguously assigned to RR         | 49860105         |
| Number of reads unambiguously assigned to SS         | 49727600         |
| Number of reads with uninformative assignment        | 27985208         |
| Number of reads with unknown or ambiguous assignment | 56719524         |
| Total number of SNPs identified                      | 3826144          |
| Total number of child unique SNPs                    | 1909584          |

Note: This table presents the number of reads generated vs those that could be unambiguously mapped to one parental genome or the other based on species-informative single nucleotide variants using Stampy (see Materials and methods). The right-most column reports the total of RSabn\_F and SR\_F. RR = *H. armigera*, SS = *H. assulta*.

**Table S3.** Annotation of *H. armigera*-derived alleles expressed in RSabn\_M and RSabn\_F.

| Gene ID        | Loading scores | Gene names                                                                       |
|----------------|----------------|----------------------------------------------------------------------------------|
| XM_021330508.1 | 0.076079       | HarmOR14                                                                         |
| HarmOR14b      | 0.074236       | HarmOR14b                                                                        |
| XM_021333189.1 | 0.072903       | uncharacterized LOC110375164 (LOC110375164), mRNA                                |
| XM_021345446.1 | 0.068927       | cytochrome P450 6B6 (LOC110384248), mRNA                                         |
| XM_021329886.1 | 0.068539       | multidrug resistance protein 1B-like (LOC110372874), mRNA                        |
| HarmOR13       | 0.062859       | HarmOR13                                                                         |
| XM_021330489.1 | 0.061132       | odorant receptor 13a-like (LOC110373267), transcript variant X1, mRNA            |
| XM_021338031.1 | 0.060224       | mucin-3A (LOC110378669), mRNA                                                    |
| XM_021334791.1 | 0.059157       | ejaculatory bulb-specific protein 3-like (LOC110376344), mRNA                    |
| XM_021326364.1 | 0.058879       | cytochrome P450 4c3-like (LOC110370525), mRNA                                    |
| XM_021336226.1 | 0.058256       | juvenile hormone esterase-like (LOC110377360), mRNA                              |
| XM_021330490.1 | 0.056229       | odorant receptor 13a-like (LOC110373267), transcript variant X2, mRNA            |
| XM_021343539.1 | 0.054088       | probable cytochrome P450 6a13 (LOC110382836), mRNA                               |
| XM_021327841.1 | 0.053254       | uncharacterized protein K02A2.6-like (LOC110371520), mRNA                        |
| XM_021328832.1 | 0.049859       | pollen-specific leucine-rich repeat extensin-like protein 1 (LOC110372241), mRNA |
| XM_021329235.1 | 0.04939        | forkhead box protein F2-like (LOC110372486), transcript variant X1, mRNA         |
| XR_002429515.1 | 0.049336       | uncharacterized LOC110376029 (LOC110376029), ncRNA                               |
| XM_021329693.1 | 0.048717       | uncharacterized LOC110372738 (LOC110372738), mRNA                                |
| XM_021331577.1 | 0.048661       | acyl-CoA synthetase short-chain family member 3, mitochondrial (LOC110374040),   |
| XM_021329237.1 | 0.048315       | forkhead box protein F2-like (LOC110372486), transcript variant X2, mRNA         |

Note: Annotation of the top 20 genes that contributed to the variance of the *H. armigera*-derived alleles expressed in RSabn\_M and RSabn\_F.

**Table S4.** Formal criteria for classifying inheritance modes. RR = *H. armigera*, SS = *H. assulta*.

|    | RR vs SS     | Hybrid vs SS     | Hybrid vs RR     | Classification |
|----|--------------|------------------|------------------|----------------|
| 1  | RR = SS      | Hybrid = SS      | Hybrid = RR      | conserved      |
| 2  | RR < SS      | Hybrid < SS      | Hybrid > RR      | additive       |
| 3  | RR > SS      | Hybrid > SS      | Hybrid < RR      | additive       |
| 4  | RR < SS      | Hybrid < SS      | Hybrid = RR      | RR dominant    |
| 5  | RR > SS      | Hybrid > SS      | Hybrid = SS      | RR dominant    |
| 6  | RR < SS      | Hybrid = SS      | Hybrid > RR      | SS dominant    |
| 7  | RR > SS      | Hybrid = SS      | Hybrid < RR      | SS dominant    |
| 8  | RR = SS      | Hybrid < SS      | Hybrid < RR      | underdominant  |
| 9  | RR < SS      | Hybrid < SS      | Hybrid < RR      | underdominant  |
| 10 | RR > SS      | Hybrid < SS      | Hybrid < RR      | underdominant  |
| 11 | RR = SS      | Hybrid > SS      | Hybrid > RR      | overdominant   |
| 12 | RR < SS      | Hybrid > SS      | Hybrid > RR      | overdominant   |
| 13 | RR > SS      | Hybrid > SS      | Hybrid > RR      | overdominant   |
| 14 | RR = SS      | Hybrid = SS      | Hybrid $\neq$ RR | ambiguous      |
| 15 | RR = SS      | Hybrid $\neq$ SS | Hybrid = RR      | ambiguous      |
| 16 | RR = SS      | Hybrid < SS      | Hybrid > RR      | ambiguous      |
| 17 | RR = SS      | Hybrid > SS      | Hybrid < RR      | ambiguous      |
| 18 | RR $\neq$ SS | Hybrid = SS      | Hybrid = RR      | ambiguous      |
| 19 | RR < SS      | Hybrid = SS      | Hybrid < RR      | ambiguous      |
| 20 | RR > SS      | Hybrid = SS      | Hybrid > RR      | ambiguous      |
| 21 | RR < SS      | Hybrid > SS      | Hybrid = RR      | ambiguous      |
| 22 | RR > SS      | Hybrid < SS      | Hybrid = RR      | ambiguous      |
| 23 | RR < SS      | Hybrid > SS      | Hybrid < RR      | ambiguous      |
| 24 | RR > SS      | Hybrid < SS      | Hybrid > RR      | ambiguous      |

**Table S5.** GO enrichment analysis of misexpressed genes in RSabn\_M antennae.

| ID                | Description                                                                   | <i>P</i> value  | Counts    |
|-------------------|-------------------------------------------------------------------------------|-----------------|-----------|
| <b>GO:0005549</b> | <b>odorant binding</b>                                                        | <b>1.78E-11</b> | <b>23</b> |
| <b>GO:0004984</b> | <b>olfactory receptor activity</b>                                            | <b>1.20E-09</b> | <b>21</b> |
| <b>GO:0050911</b> | <b>detection of chemical stimulus involved in sensory perception of smell</b> | <b>5.14E-07</b> | <b>18</b> |
| GO:0002181        | cytoplasmic translation                                                       | 2.49E-06        | 15        |
| GO:0045599        | negative regulation of fat cell differentiation                               | 1.78E-05        | 7         |
| GO:0022627        | cytosolic small ribosomal subunit                                             | 3.01E-05        | 11        |
| GO:0050796        | regulation of insulin secretion                                               | 3.60E-05        | 8         |
| GO:0034185        | apolipoprotein binding                                                        | 4.43E-05        | 7         |
| GO:0015171        | amino acid transmembrane transporter activity                                 | 5.60E-05        | 14        |
| GO:0004129        | cytochrome-c oxidase activity                                                 | 9.61E-05        | 7         |
| GO:0150094        | amyloid-beta clearance by cellular catabolic process                          | 9.61E-05        | 7         |
| GO:0032590        | dendrite membrane                                                             | 9.83E-05        | 13        |
| GO:0003735        | structural constituent of ribosome                                            | 0.000115        | 34        |
| GO:0008574        | ATP-dependent microtubule motor activity                                      | 0.000188        | 7         |
| GO:0022626        | cytosolic ribosome                                                            | 0.000207        | 9         |
| GO:0016600        | flotillin complex                                                             | 0.000258        | 6         |
| GO:0033391        | chromatoid body                                                               | 0.000258        | 6         |
| GO:0061351        | neural precursor cell proliferation                                           | 0.000258        | 6         |
| GO:0070822        | Sin3-type complex                                                             | 0.000258        | 6         |
| GO:0022625        | cytosolic large ribosomal subunit                                             | 0.000268        | 10        |
| GO:0071392        | cellular response to estradiol stimulus                                       | 0.000341        | 7         |
| GO:0005865        | striated muscle thin filament                                                 | 0.000415        | 13        |

**Table S6.** GO enrichment analysis of misexpressed genes in RSabn\_F antennae.

| ID                | Description                                                                   | <i>P</i> value  | Counts    |
|-------------------|-------------------------------------------------------------------------------|-----------------|-----------|
| GO:0022625        | cytosolic large ribosomal subunit                                             | 9.02E-05        | 12        |
| GO:0048787        | presynaptic active zone membrane                                              | 9.31E-05        | 7         |
| GO:0043195        | terminal bouton                                                               | 0.000139        | 30        |
| GO:0036098        | male germ-line stem cell population maintenance                               | 0.00019         | 9         |
| <b>GO:0004984</b> | <b>olfactory receptor activity</b>                                            | <b>0.000207</b> | <b>16</b> |
| GO:0051721        | protein phosphatase 2A binding                                                | 0.000216        | 12        |
| GO:0016281        | eukaryotic translation initiation factor 4F complex                           | 0.000225        | 7         |
| GO:0140326        | ATPase-coupled intramembrane lipid transporter activity                       | 0.000225        | 7         |
| GO:0022626        | cytosolic ribosome                                                            | 0.000256        | 10        |
| GO:0022627        | cytosolic small ribosomal subunit                                             | 0.000299        | 11        |
| GO:0043186        | P granule                                                                     | 0.000301        | 15        |
| GO:0045087        | innate immune response                                                        | 0.0004          | 39        |
| GO:0046529        | imaginal disc fusion                                                          | 0.000412        | 8         |
| GO:0008239        | dipeptidyl-peptidase activity                                                 | 0.000453        | 11        |
| GO:1902017        | regulation of cilium assembly                                                 | 0.000453        | 11        |
| GO:0017146        | NMDA selective glutamate receptor complex                                     | 0.000473        | 7         |
| GO:0007281        | germ cell development                                                         | 0.000496        | 18        |
| GO:0030018        | Z disc                                                                        | 0.000532        | 31        |
| GO:0007269        | neurotransmitter secretion                                                    | 0.00065         | 29        |
| <b>GO:0005549</b> | <b>odorant binding</b>                                                        | <b>0.000718</b> | <b>15</b> |
| GO:0009792        | embryo development ending in birth or egg hatching                            | 0.000718        | 15        |
| GO:0004890        | GABA-A receptor activity                                                      | 0.000722        | 8         |
| GO:0031629        | synaptic vesicle fusion to presynaptic active zone membrane                   | 0.000722        | 8         |
| GO:0042023        | DNA endoreduplication                                                         | 0.000722        | 8         |
| GO:0007297        | ovarian follicle cell migration                                               | 0.000899        | 7         |
| <b>GO:0050911</b> | <b>detection of chemical stimulus involved in sensory perception of smell</b> | <b>0.000937</b> | <b>15</b> |
| GO:0005112        | Notch binding                                                                 | 0.00095         | 10        |
| GO:0045751        | negative regulation of Toll signaling pathway                                 | 0.001021        | 6         |
| GO:1990904        | ribonucleoprotein complex                                                     | 0.001153        | 30        |
| GO:0042438        | melanin biosynthetic process                                                  | 0.001195        | 8         |
| GO:0001822        | kidney development                                                            | 0.001269        | 12        |
| GO:0030833        | regulation of actin filament polymerization                                   | 0.001269        | 12        |
| GO:0033674        | positive regulation of kinase activity                                        | 0.001269        | 12        |
| GO:1903688        | positive regulation of border follicle cell migration                         | 0.001341        | 16        |
| GO:0005319        | lipid transporter activity                                                    | 0.001348        | 11        |

**Table S7.** Formal criteria for classifying *cis* and *trans* genetic contributions. RR = *H. armigera*, SS = *H. assulta*.

|     | RR vs SS     | RR allele vs SS allele     | TransTest                        | Classification                   |
|-----|--------------|----------------------------|----------------------------------|----------------------------------|
| 1   | RR = SS      | RR allele = SS allele      | RR/SS = RR allele/SS allele      | Conserved                        |
| 2   | RR = SS      | RR allele $\neq$ SS allele | RR/SS $\neq$ RR allele/SS allele | Compensatory                     |
| 3   | RR $\neq$ SS | RR allele = SS allele      | RR/SS $\neq$ RR allele/SS allele | All <i>trans</i>                 |
| 4   | RR $\neq$ SS | RR allele $\neq$ SS allele | RR/SS = RR allele/SS allele      | All <i>cis</i>                   |
| 5   | RR $\neq$ SS | RR allele $\neq$ SS allele | RR/SS $\neq$ RR allele/SS allele | <i>cis</i> and <i>trans</i>      |
| 5.1 | RR $\neq$ SS | RR allele $\neq$ SS allele | RR/SS $>$ RR allele/SS allele    | <i>cis</i> + <i>trans</i>        |
| 5.2 | RR $\neq$ SS | RR allele $\neq$ SS allele | RR/SS $<$ RR allele/SS allele    | <i>cis</i> $\times$ <i>trans</i> |

**Table S8.** Statistical analysis of the contribution of various regulatory patterns in five groups of F<sub>1</sub> hybrids. Statistical significance of the difference between different regulatory patterns was determined with Wilcoxon rank-sum test.

| Groups | Difference comparison                          | <i>P</i> value |
|--------|------------------------------------------------|----------------|
| RS_M   | <i>cis</i> + <i>trans</i> and all <i>cis</i>   | < 2.2E-16      |
|        | all <i>cis</i> and all <i>trans</i>            | 2.27E-10       |
|        | all <i>trans</i> and <i>cis</i> × <i>trans</i> | 4.05E-16       |
|        | <i>cis</i> × <i>trans</i> and compensatory     | 2.20E-16       |
|        | compensatory and conserved                     | 0.6798         |
| SR_M   | <i>cis</i> + <i>trans</i> and all <i>cis</i>   | < 2.2E-16      |
|        | all <i>cis</i> and all <i>trans</i>            | 5.28E-03       |
|        | all <i>trans</i> and <i>cis</i> × <i>trans</i> | 3.44E-14       |
|        | <i>cis</i> × <i>trans</i> and compensatory     | < 2.2E-16      |
|        | compensatory and conserved                     | 0.4396         |
| SR_F   | <i>cis</i> + <i>trans</i> and all <i>cis</i>   | < 2.2E-16      |
|        | all <i>cis</i> and all <i>trans</i>            | < 2.2E-16      |
|        | all <i>trans</i> and <i>cis</i> × <i>trans</i> | 0.1404         |
|        | <i>cis</i> × <i>trans</i> and compensatory     | < 2.2E-16      |
|        | compensatory and conserved                     | 0.001295       |



**Table S9.** Analysis of contribution of predicted regulatory patterns to gene expression divergence by RS\_M and SR\_F. Statistical significance of the difference between different regulatory patterns was determined with Wilcoxon rank-sum test.

| Regulatory patterns       | Median (RS_M) | Median (SR_F) | Difference comparison                                                 | <i>P</i> value |
|---------------------------|---------------|---------------|-----------------------------------------------------------------------|----------------|
| <i>cis + trans</i>        | 1.104826      | 1.670548      | <i>cis + trans</i> (RS_M) and <i>cis + trans</i> (SR_F)               | 2.86E-12       |
| All <i>cis</i>            | 0.3629841     | 0.6085473     | all <i>cis</i> (RS_M) and all <i>cis</i> (SR_F)                       | < 2.2E-16      |
| All <i>trans</i>          | 0.3194907     | 0.3708606     | all <i>trans</i> (RS_M) and all <i>trans</i> (SR_F)                   | 3.48E-16       |
| <i>cis</i> × <i>trans</i> | 0.2622207     | 0.3618743     | <i>cis</i> × <i>trans</i> (RS_M) and <i>cis</i> × <i>trans</i> (SR_F) | < 2.2E-16      |

**Table S10.** Analysis of contribution of predicted regulatory patterns to gene expression divergence by SR\_M and SR\_F. Statistical significance of the difference between F<sub>1</sub> hybrids of different sex was determined with Wilcoxon rank-sum test.

| Regulatory patterns       | Median (SR_M) | Median (SR_F) | Difference comparison                                                 | <i>P</i> value |
|---------------------------|---------------|---------------|-----------------------------------------------------------------------|----------------|
| <i>cis</i> + <i>trans</i> | 1.203098      | 1.670548      | <i>cis</i> + <i>trans</i> (SR_M) and <i>cis</i> + <i>trans</i> (SR_F) | 2.38E-08       |
| All <i>cis</i>            | 0.3982799     | 0.6085473     | all <i>cis</i> (SR_M) and all <i>cis</i> (SR_F)                       | < 2.2E-16      |
| All <i>trans</i>          | 0.3644779     | 0.3708606     | all <i>trans</i> (SR_M) and all <i>trans</i> (SR_F)                   | 0.1073         |
| <i>cis</i> × <i>trans</i> | 0.310307      | 0.3618743     | <i>cis</i> × <i>trans</i> (SR_M) and <i>cis</i> × <i>trans</i> (SR_F) | < 2.2E-16      |

**Supplementary Table S11.** Regulatory patterns of olfactory-related genes.

| Gene type                 | <i>ORs</i> | <i>OBPs</i> | <i>IRs</i> | <i>SNMPs</i> |
|---------------------------|------------|-------------|------------|--------------|
| Number of genes           | 77         | 42          | 28         | 2            |
| All <i>cis</i>            | 14.3%      | 9.5%        | 14.3%      | 0%           |
| All <i>trans</i>          | 9.1%       | 7.1%        | 0%         | 0%           |
| <i>cis</i> + <i>trans</i> | 3.9%       | 0%          | 0%         | 0%           |
| <i>cis</i> × <i>trans</i> | 18.2%      | 23.8%       | 21.4 %     | 50%          |
| Compensatory              | 14.3%      | 16.7%       | 14.3%      | 50%          |
| Conserved                 | 6.5%       | 11.9%       | 7.1%       | 0%           |
| Ambiguous                 | 19.5%      | 4.8%        | 17.9%      | 0%           |
| Uninformative             | 14.3%      | 26.2%       | 25%        | 0%           |

Note: *ORs*: odorant receptors; *OBPs*: odorant-binding proteins; *IRs*: ionotropic receptors;

*SNMPs*: sensory neuron membrane proteins.

**Table S12.** Correlation coefficients between the gene expression levels of PRs in antennae and electrophysiological response.

|            | <i>OR6</i>     | <i>OR11</i>    | <i>OR13</i>    | <i>OR14</i>    | <i>OR14b</i>  | <i>OR15</i>    | <i>OR16</i>    |
|------------|----------------|----------------|----------------|----------------|---------------|----------------|----------------|
| Z11-16:Ald | -0.4<br>(0.52) | 0.9<br>(0.083) | 0.9<br>(0.083) | 0.1<br>(0.95)  | 0 (1)         | 0.8<br>(0.13)  | 0.3<br>(0.68)  |
| Z9-16:Ald  | 0.3<br>(0.68)  | 0.3<br>(0.68)  | 0.3<br>(0.68)  | 0.7<br>(0.23)  | 0.6<br>(0.35) | -0.1<br>(0.95) | 0.9<br>(0.083) |
| Z9-14:Ald  | 0.4<br>(0.52)  | 0.4<br>(0.52)  | 0.4<br>(0.52)  | 0.9<br>(0.083) | 0.7<br>(0.23) | 0 (1)          | 1 (0.017)      |

Note: The table shows the correlation analysis between the electrophysiological responses of the antennae in RR\_M, SS\_M, RS\_M, RSabn\_M and SR\_M to 10 µg/µL of Z11-16:Ald, Z9-16:Ald and Z9-14:Ald and the gene expression levels of *PRs*. The corresponding *P*-values are in parentheses.

**Table S13.** Primers used for RT-PCR of autosomal marker gene *GOBP1*, Z chromosome marker gene *TPI*, W chromosome marker gene *GUW1*.

| Gene         | Primer | Sequence (5' - 3')     |
|--------------|--------|------------------------|
| <i>GOBP1</i> | F      | CACCGAGAAGTTCATCCAGTCG |
|              | R      | CTTGAAGCACTCGGCCACGTGC |
| <i>TPI</i>   | F      | TGTTGCCGCACAAAAC TG    |
|              | R      | CTTACTTTCTCTGCAAC      |
| <i>GUW1</i>  | F      | CAATAGACGGCGTGATGTTT   |
|              | R      | ATCGCTTCGCCTCTTTAACT   |

Note: F: forward strand; R: reverse strand.

**Table S14.** Tested sex pheromone compounds for functional analysis of RR\_M, SS\_M, RS\_M, RSabn\_M and SR\_M.

| Compounds  | Purity | Supplier  |
|------------|--------|-----------|
| Z11-16:Ald | 95%    | Shin-Etsu |
| Z9-16:Ald  | 95%    | Shin-Etsu |
| Z9-14:Ald  | 95%    | Shin-Etsu |

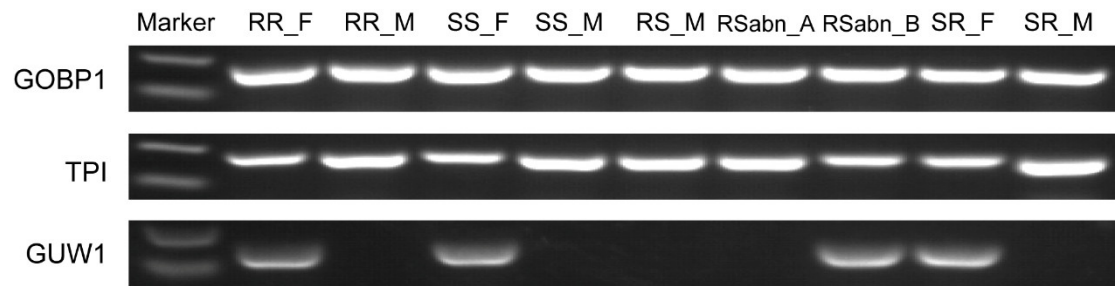

**Figure S1.** Identification of the sex of the two sterile abnormal  $F_1$  hybrids. The figure shows the expression of the autosomal marker gene *GOBP1*, Z chromosome marker gene *TPI* and W chromosome marker gene *GUW1* of RR\_F, RR\_M, SS\_F, SS\_M, RS\_M, RSabn\_M, SR\_M, RSabn\_F and SR\_F as amplified by PCR.

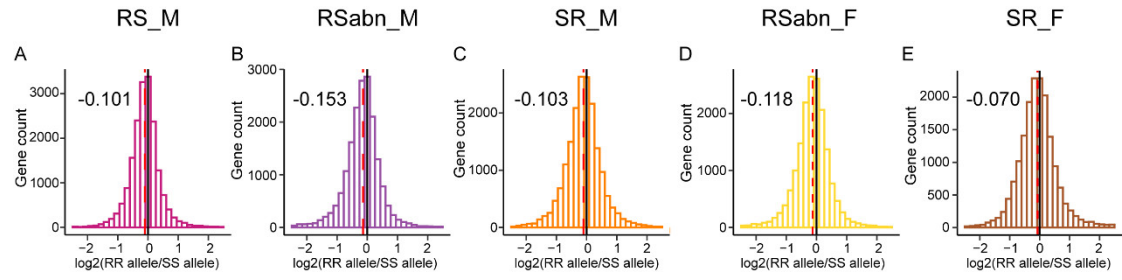

**Figure S2.** Histograms of allele-specific expression direction and magnitude of  $F_1$  hybrids.

Median  $\log_2$  ratios of RR allele/SS allele expression is taken for each gene in  $F_1$  hybrids

(RS\_M (A), RSabn\_M (B), SR\_M (C), RSabn\_F (D) and SR\_F (E)). The black solid line at zero ( $x = 0$ ) indicates the same expression of the RR allele and SS allele, and the red dotted line indicates the median of the allele-specific expression bias observed in the antennae of  $F_1$  hybrids.



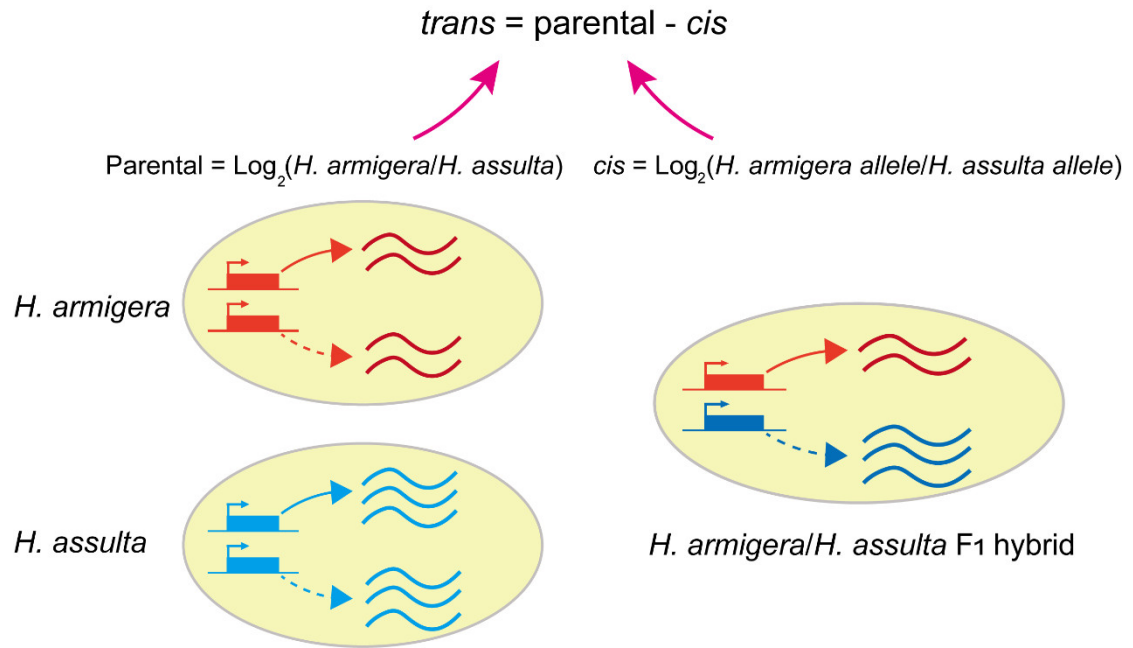

**Figure S3.** Estimation of *cis*- and *trans*-regulatory variants from the difference between the antennal gene expression of parents and F<sub>1</sub> hybrid allele-specific expression. The difference in antennal gene expression between *H. armigera* and *H. assulta* reflects both *cis*- and *trans*-regulatory variants, whereas the expression of the same gene in the common *trans*-regulatory environment of the F<sub>1</sub> hybrid reflects *cis*-regulatory variants between *H. armigera* and *H. assulta* alleles. Although *trans*-regulatory variants could not be directly measured, they could be inferred by the difference in parental-*cis*.

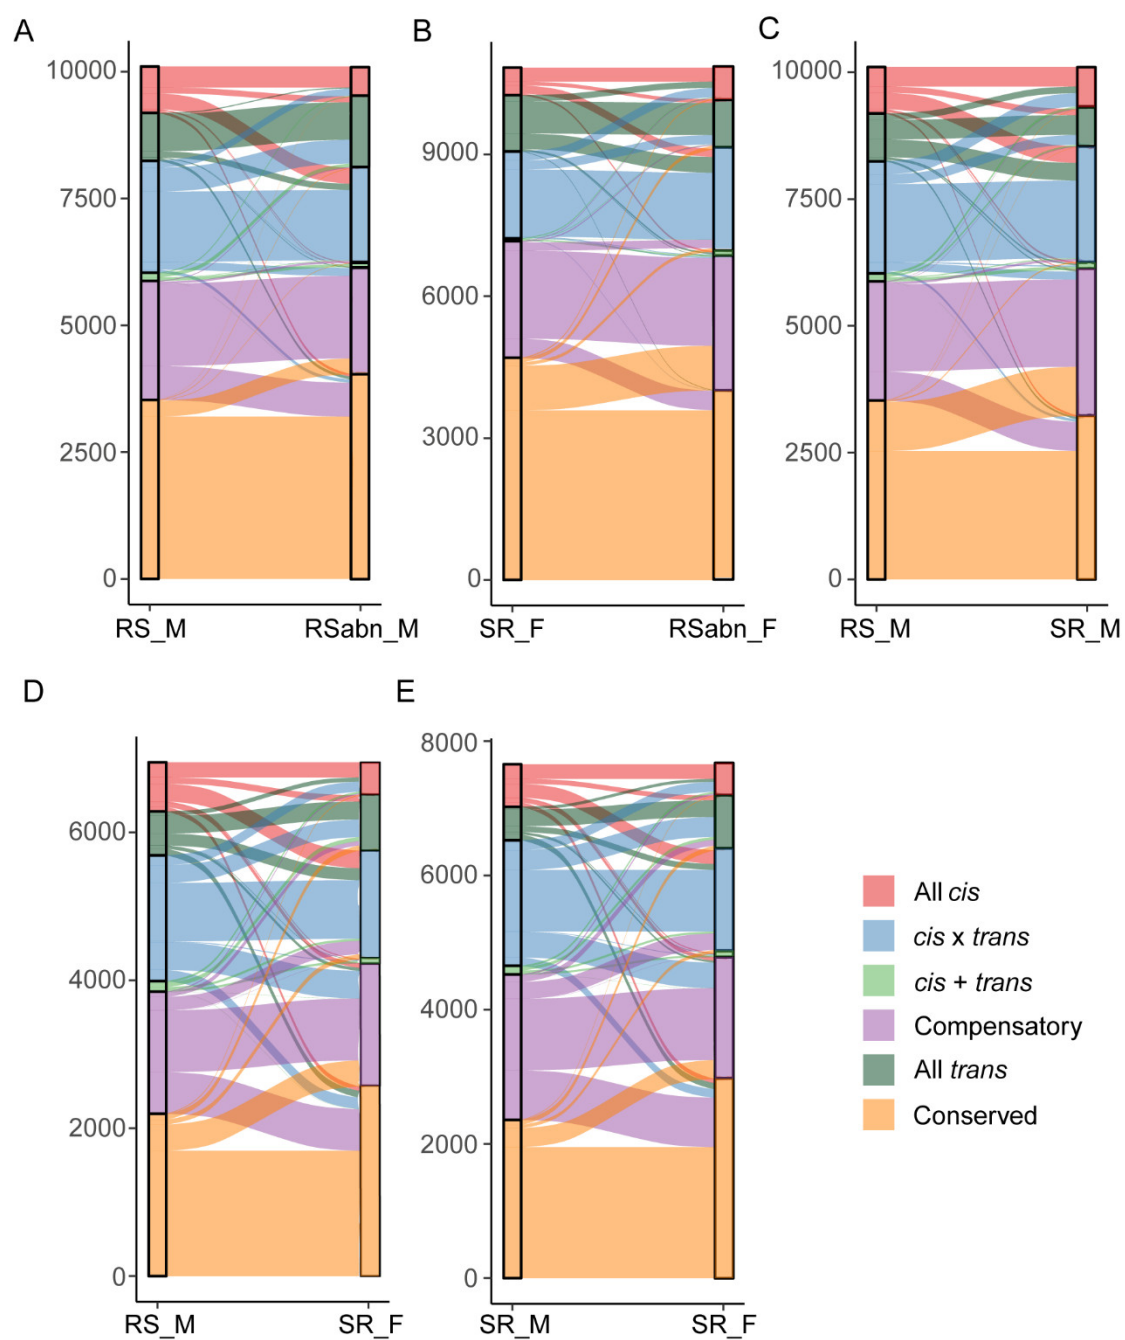

**Figure S4.** Alluvial plots showing changes in the numbers of genes inferred for each regulatory pattern through different F<sub>1</sub> hybrids.

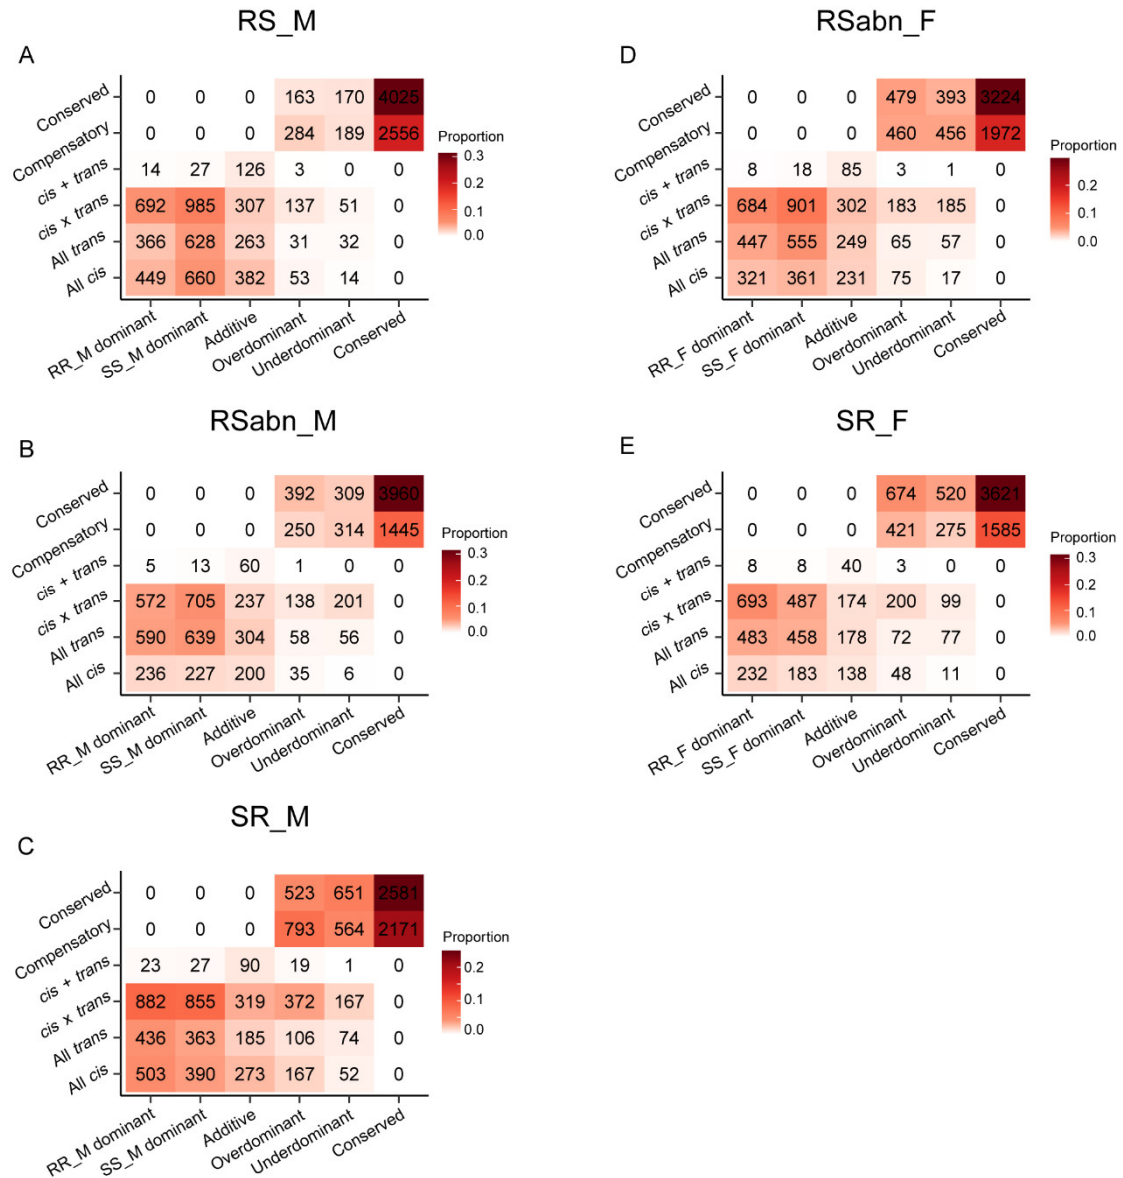

**Figure S5.** Relationships between regulatory patterns and inheritance modes. Heatmaps tally the number of genes with the same pair of classification in five groups of F<sub>1</sub> hybrids (RS\_M (A), RSabn\_M (B), SR\_M (C), RSabn\_F (D) and SR\_F (E)), with inheritance modes on the *X*-axis and regulatory patterns on the *Y*-axis.
